# Supplementary material
Source: Elsevier journal article supplement (https://www.sciencedirect.com/science/article/pii/S0870255122003596)
Supplement: mmc1 [file S0870255122003596:mmc1.doc]

**SUPPLEMENTARY TABLE 1B.** Demographic data and baseline characteristics of all patients.

|  | **All patients** (n=728) | **APT at discharge** (n=380) | **No APT at discharge** (n=348) | **p value** |
| --- | --- | --- | --- | --- |
| **Age***(years), median (IQR)* | 73 (16) | 73 (16) | 73 (17) | 0.904 |
| **Women,** n (%) | 633 (87.3%) | 333 (87.6%) | 299 (86.9%) | 0.774 |
| **Hypertension,** n (%) | 458 (66.2%) | 255 (67.8%) | 203 (64.2%) | 0.350 |
| **Hypercholesterolemia,** n (%) | 381 (55.6%) | 205 (54.8%) | 175 (56.5%) | 0.668 |
| **Diabetes mellitus,** n (%) | 111 (16.3%) | 65 (17.5%) | 46 (15.0%) | 0.374 |
| **Active smoking,** n (%) | 99 (14.3%) | 63 (16.8%) | 36 (11.5%) | **0.048** |
| **Obesity,** n (%) | 103 (15.6%) | 63 (17.3%) | 40 (13.6%) | 0.199 |
| **Chronic kidney disease.** N (%) | 34 (5.0%) | 19 (5.1%) | 15 (4.9%) | 0.922 |
| **COPD/Asthma,** n (%) | 110 (16.1%) | 55 (14.7%) | 55 (17.7%) | 0.275 |
| **Ischemic heart disease,** n (%) | 10 (1.4%) | 7 (1.8%) | 3 (0.9%) | 0.256 |
| **Heart failure,** n (%) | 9 (1.2%) | 3 (0.4%) | 6 (1.7%) | 0.324 |
| **TIA / Stroke,** n (%) | 36 (4.9%) | 22 (5.8%) | 14 (4.0%) | 0.272 |
| **NYHA class> I previous to hospitalization,** n (%) | 135 (19.7%) | 75 (20%) | 60 (19.4%) | 0.833 |

COPD, chronic pulmonary obstructive disease; TIA, transient ischemic attack.
