# Supplementary material
Source: Elsevier journal article supplement (https://www.sciencedirect.com/science/article/pii/S0870255122003596)
Supplement: mmc2 [file S0870255122003596:mmc2.doc]

**SUPPLEMENTARY TABLE 2B.** Clinical presentation in all patients.

|  | **All patients** (n=728) | **APT at discharge** (n=380) | **No APT at discharge** (n=348) | **p value** |
| --- | --- | --- | --- | --- |
| **Trigger***, n (%)* |  |  |  |  |
| *Psychological* | 274 (39.7%) | 158 (41.9%) | 116 (36.8%) | 0.190 |
| *Physical* | 163 (23.6%) | 73 (19.4%) | 90 (28.6%) | **0.004** |
| *Mixed* | 33 (4.8%) | 12 (3.2%) | 21 (6.7%) | **0.033** |
| *None* | 222 (32.0%) | 134 (35.5%) | 88 (27.8%) | **0.030** |
| **Chest pain at presentation***, n (%)* |  |  |  |  |
| *Angina at rest* | 361 (52.2%) | 198 (52.4%) | 163 (52.1%) | 0.901 |
| *Angina on exertion* | 98 (14.2%) | 64 (16.9%) | 34 (10.9%) | **0.022** |
| *Mixed* | 10 (1.4%) | 5 (1.3%) | 5 (1.6%) | 0.767 |
| *Atypical* | 70 (10.1%) | 45 (11.9%) | 25 (8.0%) | 0.086 |
| *None* | 152 (22.0%) | 66 (17.5%) | 86 (27.5%) | **0.001** |
| **Heart rate at presentation, (**beats/min) median (IQR) | 85 (25) | 84 (21) | 90 (33) | **0.019** |
| **Shock at presentation,** n (%) | 59 (8.7%) | 20 (5.3%) | 39 (12.9%) | **0.001** |
| **Worst Killip class during hospitalization >I,** n (%) | 253 (37.2%) | 112 (29.9%) | 141 (46.2%) | **<0.001** |
| **Intraventricular thrombus, stroke or systemic embolism,** n (%) | 34 (5.1%) | 17 (4.6%) | 17 (5.7%) | 0.530 |
| **Pulmonary embolism,** n (%) | 2 (0.3%) | 0 (0%) | 2 (0.7%) | 0.114 |
| **Any bleeding,** n (%) | 22 (3.3%) | 10 (2.7%) | 12 (4%) | 0.350 |
| **Acute kidney injury,** n (%) | 69 (10.4%) | 29 (7.9%) | 40 (13.4%) | **0.021** |
| **Infection,** n (%) | 148 (22.2%) | 79 (21.4%) | 69 (23.2%) | 0.577 |
| **Non-invasive mechanical ventilation,** n (%) | 45 (6.2%) | 25 (6.6%) | 20 (5.7%) | 0.642 |
| **Mechanical ventilation,** n (%) | 45 (6.2%) | 10 (2.6%) | 35 (10.1%) | **<0.001** |
