# Supplementary material
Source: Elsevier journal article supplement (https://www.sciencedirect.com/science/article/pii/S0870255122003596)
Supplement: mmc3 [file S0870255122003596:mmc3.doc]

**SUPPLEMENTARY TABLE 3B.** Significant blood tests, EKG, angiography and echocardiography in all patients.

|  | **All patients** (n=728) | **APT at discharge** (n=380) | **No APT at discharge** (n=348) | **p value** |
| --- | --- | --- | --- | --- |
| **Hemoglobin** (g/dL), median (IQR) | 13.3 (1.7) | 13.4 (1.7) | 13.25 (1.7) | 0.214 |
| **Creatinine highest value** (mg/dL), median (IQR) | 0.9 (0.4) | 0.9 (0.38) | 0.9 (0.48) | 0.537 |
| **CK highest value** U/L, median (IQR) | 181 (207) | 191 (173) | 180 (246) | 0.426 |
| **Heart rhythm,** n (%) |  |  |  |  |
| *Sinus* | 591 (87.4%) | 341 (90.9%) | 250 (83.1%) | **0.001** |
| *Atrial fibrillation* | 57 (8.4%) | 22 (5.9%) | 35 (11.6%) | **0.007** |
| *Pacemaker* | 14 (2.1%) | 4 (1.1%) | 10 (3.3%) | **0.023** |
| *Other* | 14 (2.1%) | 8 (2.1%) | 6 (2.0%) | 0.894 |
| **ST elevation at presentation,** n (%) | 406 (60.6%) | 232 (61.9%) | 174 (59%) | 0.448 |
| **Right dominance,** n (%) | 578 (88.4%) | 317 (88.8%) | 261 (87.9%) | 0.716 |
| **LVEF (%) at diagnosis,** mean (SD) | 43 (11.8) | 44.4 (12.3) | 40.8 (10.7) | **<0.001** |
| **LVEF (%) at recovery,** mean (SD) | 62.9 (8.6) | 63.3 (9.3) | 62.2 (7.2) | **0.001** |
| **More than mild MR at recovery (≥II/IV),** n (%) | 152 (20.9%) | 101 (26.6%) | 51 (14.7%) | **<0.001** |

Cr, creatinine; CK, creatine kinase; LVEF, left ventricle ejection fraction; MR, mitral regurgitation.
