# Supplementary material
Source: Elsevier journal article supplement (https://www.sciencedirect.com/science/article/pii/S0870255122003596)
Supplement: mmc4 [file S0870255122003596:mmc4.doc]

**SUPPLEMENTARY TABLE 4.** Treatment previous to hospitalization and at discharge in all patients.

|  | **All patients** (n=728) | **APT at discharge** (n=380) | **No APT at discharge** (n=348) | **p value** |
| --- | --- | --- | --- | --- |
| **Treatment previous to hospitalization** |  |  |  |  |
| Any antiplatelet treatment | 116 (15.9%) | 92 (24.2%) | 24 (6.9%) | **<0.001** |
| ACEI / ARB,n (%) | 295 (40.5%) | 173 (45.5%) | 122 (35.1%) | **0.004** |
| Betablockers,n (%) | 65 (8.9%) | 36 (9.5%) | 29 (8.3%) | 0.590 |
| Statins,n (%) | 186 (25.5%) | 112 (29.5%) | 74 (21.3%) | **0.011** |
| Anticoagulants,n (%) | 70 (9.6%) | 21 (5.5%) | 49 (14.1%) | **<0.001** |
| **Treatment at discharge** |  |  |  |  |
| ACEI / ARB, n (%) | 443 (60.9%) | 287 (75.5%) | 156 (44.8%) | **<0.001** |
| Betablockers, n (%) | 420 (57.7%) | 268 (70.5%) | 152 (43.7%) | **<0.001** |
| Diuretics, n (%) | 176 (24.2%) | 98 (25.8%) | 78 (22.4%) | 0.288 |
| Statins, n (%) | 358 (49.2%) | 261 (68.7%) | 97 (27.7%) | **<0.001** |
| Anticoagulation, n (%) | 127 (17.4%) | 44 (11.6%) | 83 (23.9%) | **<0.001** |

ACEI, angiotensin convertase enzyme inhibitor; ARB, angiotensin receptor blocker.
