# Supplementary material
Source: Elsevier journal article supplement (https://www.sciencedirect.com/science/article/pii/S0870255122003596)
Supplement: mmc5 [file S0870255122003596:mmc5.doc]

**Table 5B.** Multivariate analysis for survival free of primary endpoint using Cox regression with time-dependent variable.

|  | **Multivariate analysis** | |
| --- | --- | --- |
|  | **HR (95% CI)** | **p value** |
| **Any antiplatelet treatment at discharge (up to 25 months)** | 0.315 (0.106-0.943) | **0.039** |
| **Age > 75 years** | 7.405 (3.300-16.617) | **<0.001** |
| **Diabetes mellitus** | 3.851 (1.860-7.972) | **<0.001** |
| **Obesity** | 0.298 (0.090-0.987) | **0.048** |
| **No pain at presentation** | 2.607 (1.287-5.283) | **0.008** |
| **Acute kidney injury during hospitalization** | 4.702 (2.140-10.332) | **<0.001** |

**Table 6B.** Multivariate analysis for secondary endpoint of recurrence or readmission using Cox regression with time-dependent variable.

|  | **Multivariate analysis** | |
| --- | --- | --- |
|  | **HR (95% CI)** | **p value** |
| **Any antiplatelet treatment at discharge (up to 25 months)** | 0. 486 (0.227-1.041) | 0.064 |
| **Age > 75 years** | 1.879 (1.097-3.219) | **0.022** |
| **Hypertension** | 2.241 (1.193-4.211) | **0.012** |
| **Chronic kidney disease** | 2.427 (1.207-4.880) | **0.013** |
| **Acute kidney injury during hospitalization** | 2.617 (1.243-5.511) | **0.011** |
| **Invasive mechanical ventilation** | 2.906 (1.217-6.939) | **0.016** |

**Table 7B.** Multivariate analysis for survival free of secondary endpoint of death, recurrence or readmission using Cox regression with time-dependent variable.

|  | **Multivariate analysis** | |
| --- | --- | --- |
|  | **HR (95% CI)** | **p value** |
| **Any antiplatelet treatment at discharge (up to 25 months)** | 0.318 (0.164-0.619) | **0.001** |
| **Age > 75 years** | 3.398 (2.141-5.391) | **0.001** |
| **Diabetes mellitus** | 2.405 (1.420-4.073) | **0.001** |
| **Hospitalization length >Q3 (10 days)** | 1.608 (1.030-2.510) | **0.036** |
| **Acute kidney injury during hospitalization** | 3.087 (1.727-5.519) | **<0.001** |
